# Supplementary material for: Giant amino acids designed on the polysaccharide scaffold and their protein-like structural interconversion
Source: Royal Society of Chemistry journal article supplement (doi:10.1039/c3ob41845f), 2013-11-19
Supplement: c3ob41845f.pdf [file c3ob41845f.pdf]

## Supporting information

# Giant amino acids designed on the polysaccharide scaffold and their protein-like structural interconversion

Shun-ichi Tamaru\*, Daisuke Tokunaga, Kaori Hori, Sayaka Matsuda, and Seiji Shinkai

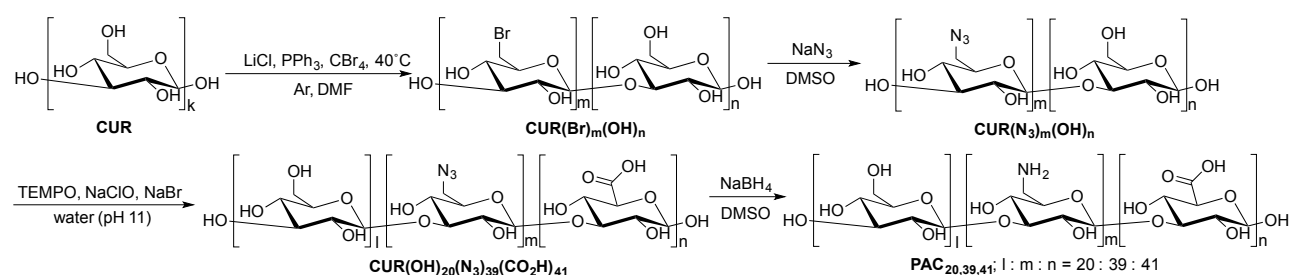

**Scheme SI-1**, Synthesis of  $\text{PAC}_{20,39,41}$ .

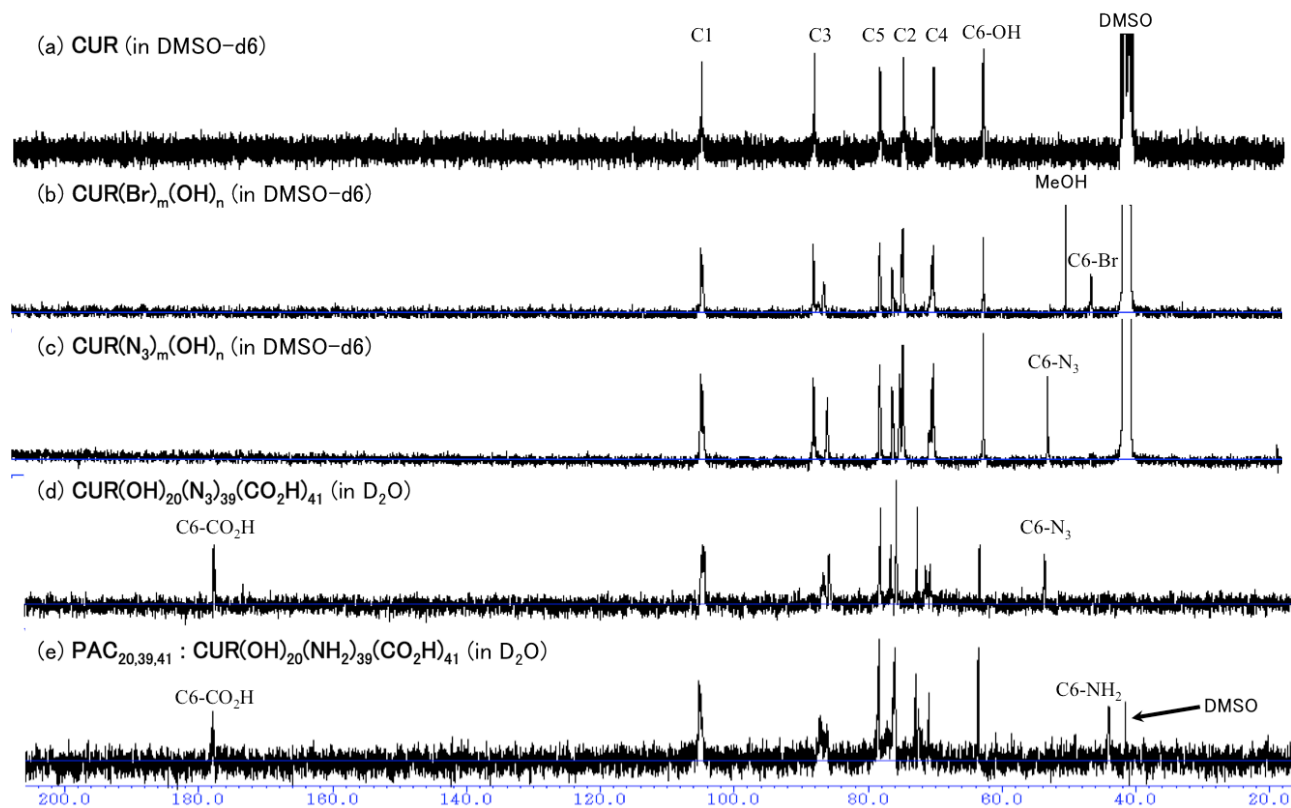

**Figure SI-1.**  $^{13}\text{C}$  NMR spectra of the intermediates, and product of the synthesis of  $\text{PAC}_{20,39,41}$ . (a) curdlan, (b)  $\text{CUR}(\text{Br})_m(\text{OH})_n$ , (c)  $\text{CUR}(\text{N}_3)_m(\text{OH})_n$  (d)  $\text{CUR}(\text{OH})_l(\text{N}_3)_m(\text{CO}_2\text{H})_{41}$  (e)  $\text{PAC}_{20,39,41}$ .

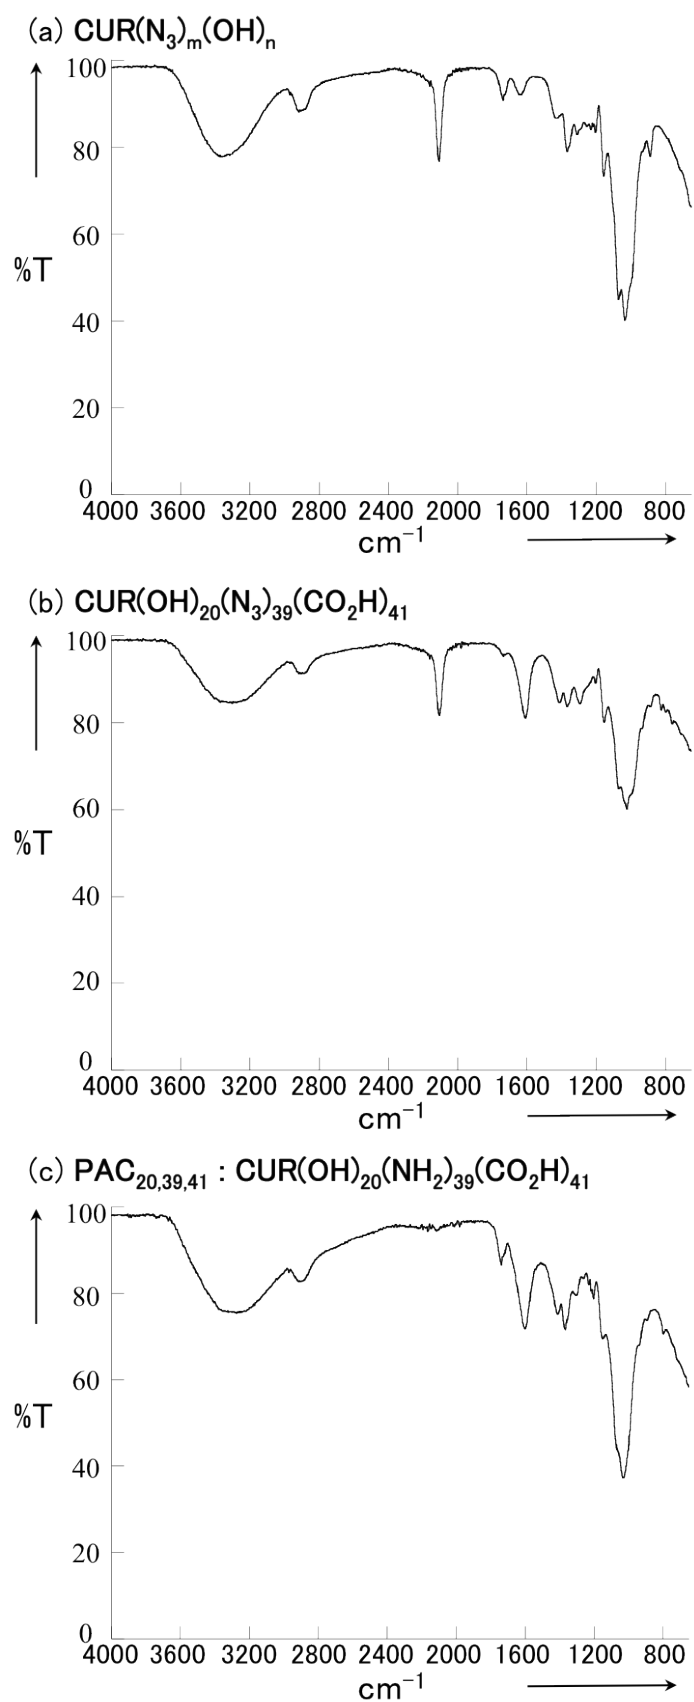

Figure SI-2. IR spectra of the intermediates and product of the synthesis of  $\text{PAC}_{20,39,41}$ . (a)  $\text{CUR}(\text{N}_3)_m(\text{OH})_n$  (b)  $\text{CUR}(\text{OH})_1(\text{N}_3)_m(\text{CO}_2\text{H})_n$  (c)  $\text{PAC}_{20,39,41}$ .

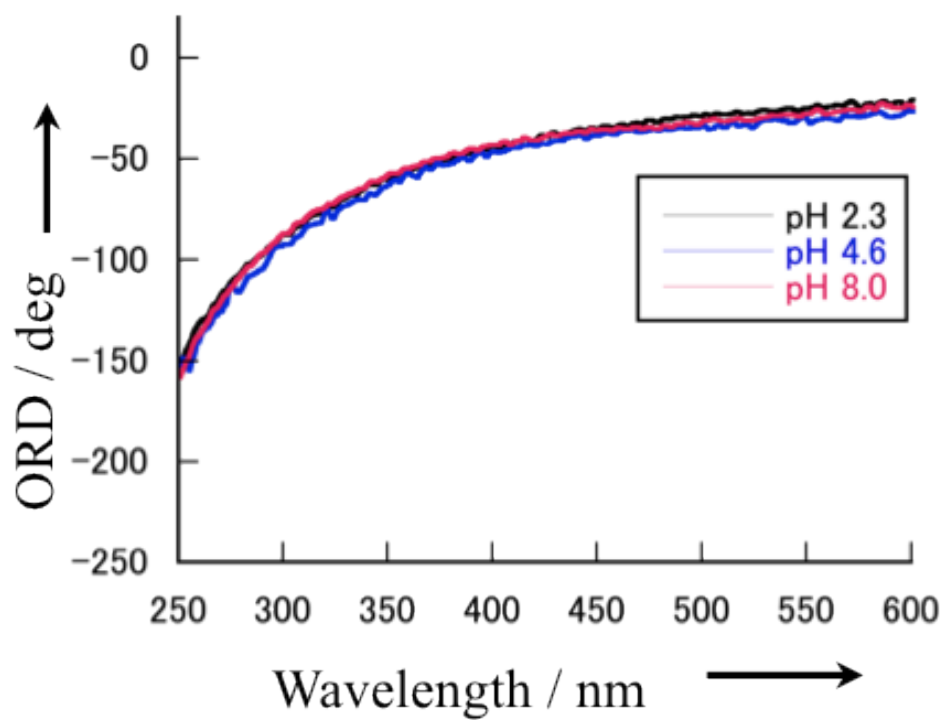

Figure SI-3. ORD spectra of CAC<sub>40,60</sub> in pH 2.3, pH4.6, or pH 8.0.

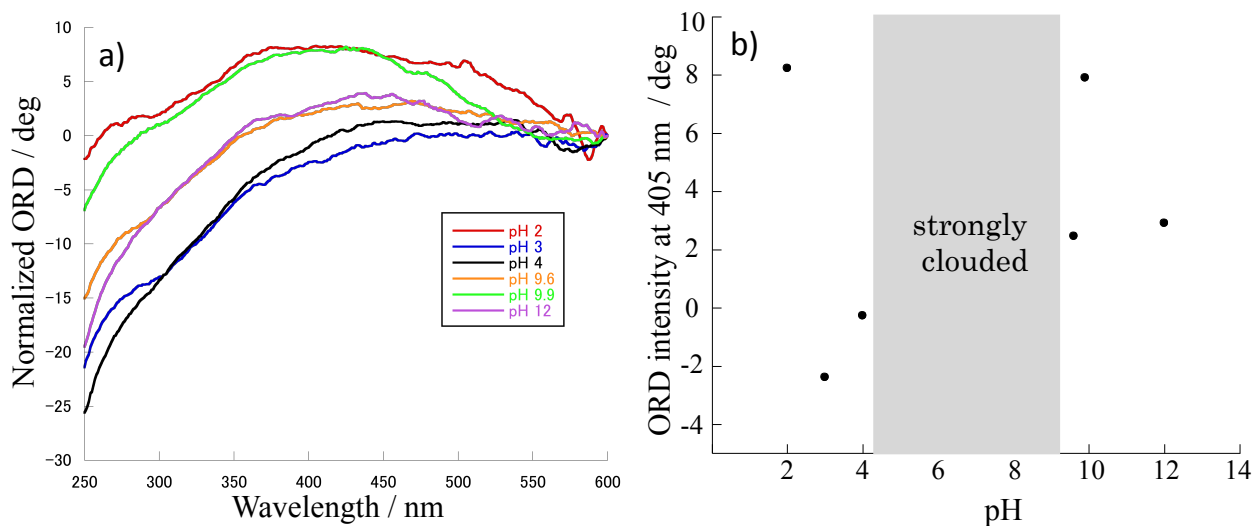

Figure SI-4. a) ORD spectral change of **PAC**<sub>63,27,10</sub> (20 mM) upon the pH change; b) Plots of the ORD intensity of **PAC**<sub>63,27,10</sub> at 405 nm upon the pH change. The sample solutions were strongly clouded at pH 5 ~ 9.

In this study, when we measured the ORD spectral change with consecutive pH change from pH 2.0 to pH 12 ([**PAC**<sub>63,27,10</sub>] = 20 mM), the ORD spectra supporting triple-helix formation of **PAC**<sub>63,27,10</sub> was observed at pH 2.0, and 9.9. In contrast, the **PAC** solution showed the spectra supporting random structure formation at pH 3, 4, 9.6, and 12. However, the sample solutions were strongly clouded at pH 5 ~ 9.

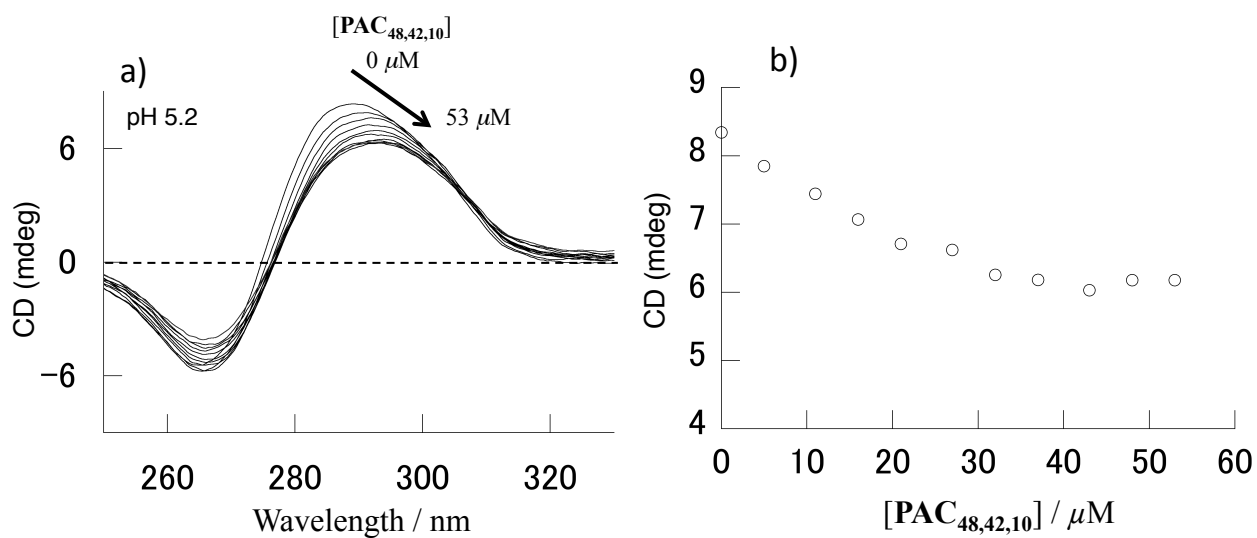

Figure SI-5, a) CD spectral change of  $\mathbf{dC}_{30}$  (1  $\mu\text{M}$ ) upon the addition of  $\mathbf{PAC}_{48,42,10}$  at pH 5.2, b) Plots of the CD intensity of  $\mathbf{PAC}_{48,42,10}$  at 290 nm upon upon the addition of  $\mathbf{PAC}_{48,42,10}$  at pH 5.2. A 10 cm quartz cell was used in this study.
